# Supplementary material for: Anti-CD3 Antibody Treatment Reduces Scar Formation in a Rat Model of Myocardial Infarction
Source: PubMed Central journal article supplement (PMC7072364; doi:10.3390/cells9020295), 2020-01-25
Supplement: cells-09-00295-s001.pdf [file cells-09-00295-s001.pdf]

Supplementary Figure

Control

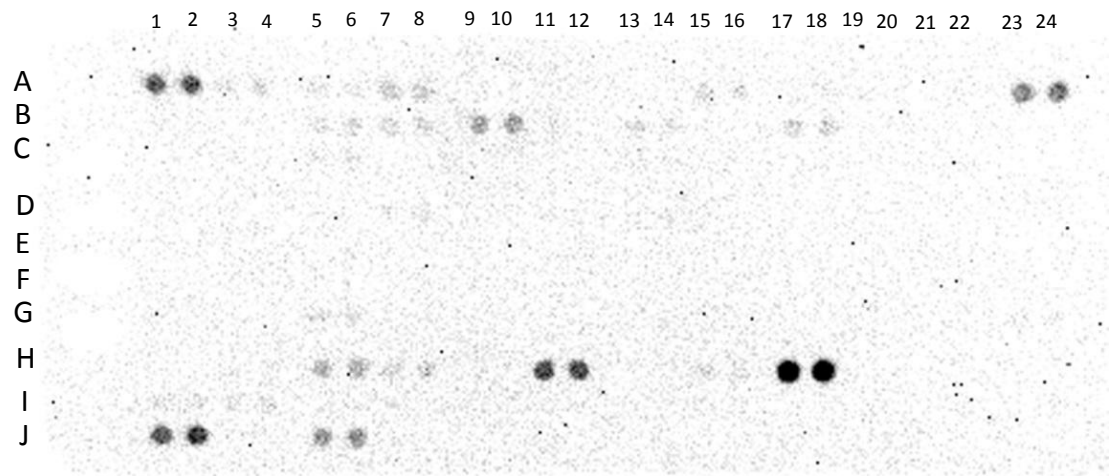

ATG  
250 µg/ml

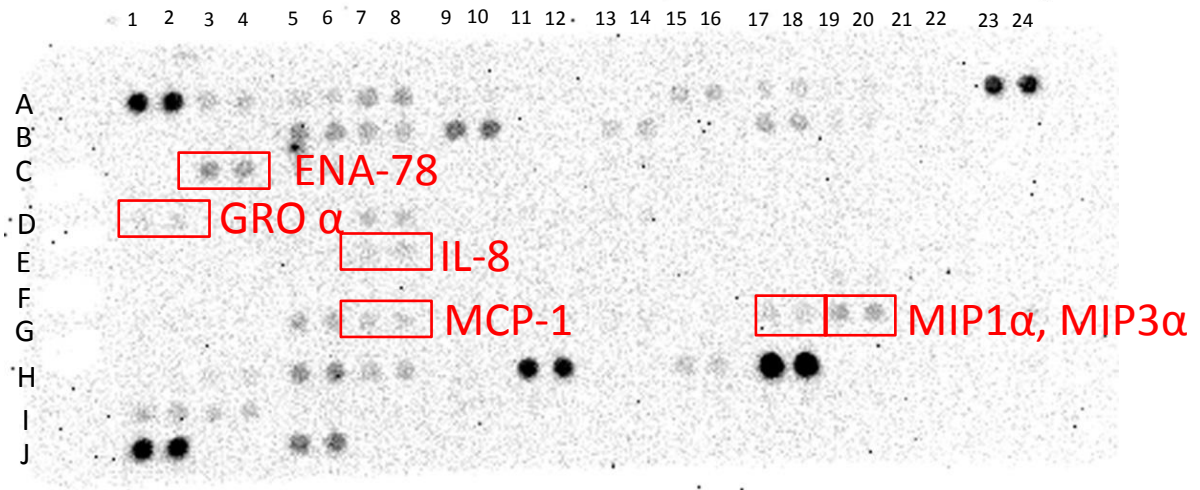

| Coordinate | Analyte                     | Coordinate | Analyte                       | Coordinate | Analyte           |
|------------|-----------------------------|------------|-------------------------------|------------|-------------------|
| A1, A2     | Reference Spots             | E1, E2     | IL-4                          | H1, H2     | Myeloperoxidase   |
| A3, A4     | Adiponectin                 | E3, E4     | IL-5                          | H3, H4     | Osteopontin       |
| A5, A6     | Apolipoprotein A-I          | E5, E6     | IL-6                          | H5, H6     | PDGF-AA           |
| A7, A8     | Angiogenin                  | E7, E8     | IL-8                          | H7, H8     | PDGF-AB/BB        |
| A9, A10    | Angiopoietin-1              | E9, E10    | IL-10                         | H9, H10    | Pentraxin 3       |
| A11, A12   | Angiopoietin-2              | E11, E12   | IL-11                         | H11, H12   | PF4               |
| A13, A14   | BAFF                        | E13, E14   | IL-12 p70                     | H13, H14   | RAGE              |
| A15, A16   | BDNF                        | E15, E16   | IL-13                         | H15, H16   | RANTES            |
| A17, A18   | Complement Component C5/C5a | E17, E18   | IL-15                         | H17, H18   | RBP-4             |
| A19, A20   | CD14                        | E19, E20   | IL-16                         | H19, H20   | Relaxin-2         |
| A21, A22   | CD30                        | E21, E22   | IL-17A                        | H21, H22   | Resistin          |
| A23, A24   | Reference Spots             | E23, E24   | IL-18 Bpa                     | H23, H24   | SDF-1 $\alpha$    |
| B3, B4     | CD40 ligand                 | F1, F2     | IL-19                         | I1, I2     | Serpin E1         |
| B5, B6     | Chitinase 3-like 1          | F3, F4     | IL-22                         | I3, I4     | SHBG              |
| B7, B8     | Complement Factor D         | F5, F6     | IL-23                         | I5, I6     | ST2               |
| B9, B10    | C-Reactive Protein          | F7, F8     | IL-24                         | I7, I8     | TARC              |
| B11, B12   | Cripto-1                    | F9, F10    | IL-27                         | I9, I10    | TFF3              |
| B13, B14   | Cystatin C                  | F11, F12   | IL-31                         | I11, I12   | TfR               |
| B15, B16   | Dkk-1                       | F13, F14   | IL-32                         | I13, I14   | TGF- $\alpha$     |
| B17, B18   | DPPIV                       | F15, F16   | IL-33                         | I15, I16   | Thrombospondin-1  |
| B19, B20   | EGF                         | F17, F18   | IL-34                         | I17, I18   | TNF- $\alpha$     |
| B21, B22   | Emmprin                     | F19, F20   | IP-10                         | I19, I20   | uPAR              |
| C3, C4     | ENA-78                      | F21, F22   | I-TAC                         | I21, I22   | VEGF              |
| C5, C6     | Endoglin                    | F23, F24   | Kallikrein 3                  | J1, J2     | Reference Spots   |
| C7, C8     | Fas Ligand                  | G1, G2     | Leptin                        | J5, J6     | Vitamin D BP      |
| C9, C10    | FGF basic                   | G3, G4     | LIF                           | J7, J8     | CD31              |
| C11, C12   | FGF-7                       | G5, G6     | Lipocalin-2                   | J9, J10    | TIM-3             |
| C13, C14   | FGF-19                      | G7, G8     | MCP-1                         | J11, J12   | VCAM-1            |
| C15, C16   | Flt-3 Ligand                | G9, G10    | MCP-3                         | J23, J24   | Negative Controls |
| C17, C18   | G-CSF                       | G11, G12   | M-CSF                         |            |                   |
| C19, C20   | GDF-15                      | G13, G14   | MIF                           |            |                   |
| C21, C22   | GM-CSF                      | G15, G16   | MIG                           |            |                   |
| D1, D2     | GRO $\alpha$                | G17, G18   | MIP-1 $\alpha$ /MIP-1 $\beta$ |            |                   |
| D3, D4     | Growth Hormone              | G19, G20   | MIP-3 $\alpha$                |            |                   |
| D5, D6     | HGF                         | G21, G22   | MIP-3 $\beta$                 |            |                   |
| D7, D8     | ICAM-1                      | G23, G24   | MMP-9                         |            |                   |
| D9, D10    | IFN- $\gamma$               |            |                               |            |                   |
| D11, D12   | IGFBP-2                     |            |                               |            |                   |
| D13, D14   | IGFBP-3                     |            |                               |            |                   |
| D15, D16   | IL-1 $\alpha$               |            |                               |            |                   |
| D17, D18   | IL-1 $\beta$                |            |                               |            |                   |
| D19, D20   | IL-1ra                      |            |                               |            |                   |
| D21, D22   | IL-2                        |            |                               |            |                   |
| D23, D24   | IL-3                        |            |                               |            |                   |
